# Supplementary material
Source: Springer Nature journal article supplement (https://www.springermedizin.de/resource/supplementary/12984_2012_418_MOESM7_ESM.pdf/9604532)

# Composite Upper-Quarter Power

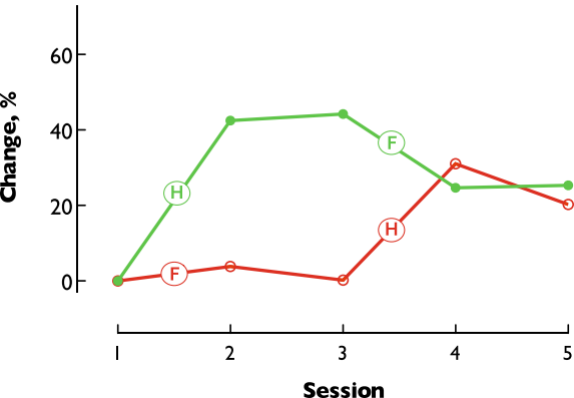

Supplement: MOESM7 [file 9604532]
